# Supplementary material
Source: PubMed Central journal article supplement (PMC7735261)
Supplement: rspb20201994supp1.pdf [file rspb20201994supp1.pdf]

**Supplementary Material for:**  
**Locomotion and paleoclimate explain the re-evolution of quadrupedal body form in**  
***Brachymeles* lizards**

Philip J. Bergmann<sup>1</sup>, Gen Morinaga<sup>1,2</sup>, Elyse S. Freitas<sup>3</sup>, Duncan J. Irschick<sup>4</sup>, Günter P. Wagner<sup>5</sup>, Cameron D. Siler<sup>3</sup>.

1. Department of Biology, Clark University, 950 Main Street, Worcester, MA 01610, USA.
2. Current Address: Department of Integrative Biology, Oklahoma State University, Stillwater, OK, USA.
3. Department of Biology and Sam Noble Oklahoma Museum of Natural History, University of Oklahoma, 2401 Chautauqua Ave., Norman, OK 73072, USA.
4. Department of Biology, University of Massachusetts Amherst, Amherst, MA, USA.
5. Department of Ecology and Evolutionary Biology, Yale University, New Haven, CT, USA.

**Table of Contents**

Supplementary Table S1: Species sampling information

Supplementary Table S2: Specimens used

Supplementary Table S3: Phylogenetic PCA loadings

Supplementary Figure S1: Phylomorphospace from phylogenetic PCA

Supplementary Table S4: Model selection for head length evolution

Supplementary Table S5: PGLS regression results

A: Relationships between surface locomotion and burying performance

B: Relationships between body form and surface locomotion

C: Relationships between body form and burying locomotion

D: Analyses using relative locomotion variables (divided by HL)

E: Relationships between head and body shape

F: Relationships between head shape and burying performance

G: Relationships between body form and soil characteristics

Supplementary Figure S2: PGLS phylomorphospaces for relationships to body form

**Supplementary Table S1:** Species sampled for morphometric and locomotion data, including their sample sizes, the number of digits they have, species mean snout–vent length (SVL), head length (HL), and pPC-1 (see text). Also presented are countries of origin and collection localities.

| Species                    | n  | Digits | SVL       | HL       | pPC-1  | Country     | Localities                                                                                                                              |
|----------------------------|----|--------|-----------|----------|--------|-------------|-----------------------------------------------------------------------------------------------------------------------------------------|
| <i>Brachymeles bicolor</i> | 2  | 5      | 77.7±2.1  | 10.5±0.1 | -12.04 | Philippines | Luzon Island, Quezon Province, Maddiangat                                                                                               |
| <i>B. boulengeri</i>       | 8  | 5      | 86.7±6.0  | 12.7±0.4 | -19.78 | Philippines | Luzon Island, Camarines Sur Province, Tabaco; Camarines Norte Province, Labo                                                            |
| <i>B. kadwa</i>            | 17 | 5      | 111.5±9.6 | 15.4±1.1 | -22.41 | Philippines | Luzon Island, Camarines Sur Province, Tabaco; Camarines Norte Province, Labo                                                            |
| <i>B. orientalis</i>       | 11 | 5      | 91.6±17.1 | 13.2±2.6 | -22.63 | Philippines | Samar Island, Municipality of San Jose de Buan                                                                                          |
| <i>B. samad</i>            | 15 | 5      | 68.9±4.7  | 9.8±0.4  | -17.92 | Philippines | Samar Island, Municipality of San Jose de Buan                                                                                          |
| <i>B. taylori</i>          | 15 | 5      | 74.8±14.1 | 10.2±1.5 | -16.00 | Philippines | Negros Island, Negros Occidental Province, Municipality of Hinoba-an; Negros Island, Negros Oriental Province, Municipality of Valencia |
| <i>B. muntingkamay</i>     | 15 | 3      | 71.4±9.6  | 7.3±0.6  | -2.26  | Philippines | Luzon Island, Quezon Province, Maddiangat                                                                                               |
| <i>B. tridactylus</i>      | 10 | 3      | 69.3±7.9  | 6.8±0.6  | 5.06   | Philippines | Negros Island, Negros Occidental Province, Municipality of Hinoba-an                                                                    |
| <i>B. bicolandia</i>       | 9  | 2      | 57.3±5.9  | 6.0±0.4  | 8.16   | Philippines | Luzon Island, Camarines Sur Province, Municipality of Tabaco; Camarines Norte Province, Municipality of Labo                            |
| <i>B. bonita</i>           | 3  | 2      | 72.6±3.8  | 7.2±0.2  | 10.02  | Philippines | Luzon Island, Camarines Norte Province, Municipality of Labo                                                                            |
| <i>B. ilocandia</i>        | 11 | 2      | 70.6±5.0  | 6.2±0.3  | 9.51   | Philippines | Luzon Island, Municipality of Gattaran, Nasipping                                                                                       |
| <i>B. lukbani</i>          | 15 | 0      | 65.6±4.8  | 6.7±0.5  | 29.25  | Philippines | Luzon Island, Camarines Norte Province, Municipality of Labo                                                                            |
| <i>B. miriamae</i>         | 5  | 0      | 61.0±9.1  | 5.4±0.4  | 30.47  | Thailand    | Nakhon Ratchasima, Skaerat Research Station                                                                                             |
| <i>Lygosoma bowringii</i>  | 11 | 5      | 47.6±4.0  | 6.7±1.4  | -13.85 | Thailand    | Prachuap Khiri Khan, KU Forestry Training Station; Chumphon, Lang Suan; Nakhon Ratchasima, Sakaerat Research Station.                   |

**Supplementary Table S2:** Specimens used in collection of morphometric and locomotion data. The Museum ID provides the museum and accession number for each specimen. The Field ID allows linking to field notes from each expedition, and the Trial ID is the identifier used in the morphometric and locomotion data.

| <b>Species</b>                | <b>Museum ID</b> | <b>Field ID</b> | <b>Trial ID</b> |
|-------------------------------|------------------|-----------------|-----------------|
| <i>Brachymeles bicolandia</i> | OMNH-45769       | CDS7617         | BIC08           |
| <i>Brachymeles bicolandia</i> | OMNH-45770       | CDS7618         | BIC13           |
| <i>Brachymeles bicolandia</i> | OMNH-45771       | CDS7621         | BIC09           |
| <i>Brachymeles bicolandia</i> | OMNH-45772       | CDS7622         | BIC10           |
| <i>Brachymeles bicolandia</i> | OMNH-45773       | CDS7625         | BIC03           |
| <i>Brachymeles bicolandia</i> | OMNH-45774       | CDS7627         | BIC05           |
| <i>Brachymeles bicolandia</i> | OMNH-45775       | CDS7628         | BIC15           |
| <i>Brachymeles bicolandia</i> | OMNH-45776       | CDS7630         | BIC01           |
| <i>Brachymeles bicolandia</i> | OMNH-45777       | CDS7631         | BIC12           |
| <i>Brachymeles bicolandia</i> | OMNH-45778       | CDS7632         | BIC14           |
| <i>Brachymeles bicolor</i>    | OMNH-46592       | CDS9117         | BCOL02          |
| <i>Brachymeles bicolor</i>    | OMNH-46593       | CDS9147         | BCOL03          |
| <i>Brachymeles bonitae</i>    | OMNH-45779       | CDS8362         | BIC19           |
| <i>Brachymeles bonitae</i>    | OMNH-45780       | CDS8380         | BIC21           |
| <i>Brachymeles bonitae</i>    | OMNH-45781       | CDS8381         | BIC20           |
| <i>Brachymeles boulengeri</i> | OMNH-45784       | CDS7619         | BOU12           |
| <i>Brachymeles boulengeri</i> | OMNH-45785       | CDS7620         | BOU03           |
| <i>Brachymeles boulengeri</i> | OMNH-45786       | CDS7623         | BOU11           |
| <i>Brachymeles boulengeri</i> | OMNH-45787       | CDS7624         | BOU13           |
| <i>Brachymeles boulengeri</i> | OMNH-45788       | CDS7626         | BOU04           |
| <i>Brachymeles boulengeri</i> | OMNH-45789       | CDS7629         | BOU06           |
| <i>Brachymeles boulengeri</i> | OMNH-45790       | CDS8382         | BOU16           |
| <i>Brachymeles boulengeri</i> | OMNH-45782       | ESF175          | BOU05           |
| <i>Brachymeles boulengeri</i> | OMNH-45783       | ESF251          | BOU10           |
| <i>Brachymeles ilocandia</i>  | OMNH-46596       | CDS7930         | Ilo01           |
| <i>Brachymeles ilocandia</i>  | OMNH-46597       | CDS7931         | Ilo02           |
| <i>Brachymeles ilocandia</i>  | OMNH-46598       | CDS7932         | Ilo03           |
| <i>Brachymeles ilocandia</i>  | OMNH-46599       | CDS7933         | Ilo04           |
| <i>Brachymeles ilocandia</i>  | OMNH-46600       | CDS7973         | Ilo147a         |
| <i>Brachymeles ilocandia</i>  | OMNH-46601       | CDS7974         | Ilo06           |
| <i>Brachymeles ilocandia</i>  | OMNH-46602       | CDS7975         | Ilo148          |
| <i>Brachymeles ilocandia</i>  | OMNH-46603       | CDS8665         | Ilo09           |
| <i>Brachymeles ilocandia</i>  | OMNH-46605       | CDS8771         | Ilo05           |
| <i>Brachymeles ilocandia</i>  | OMNH-46606       | CDS8784         | Ilo12           |
| <i>Brachymeles ilocandia</i>  | OMNH-46594       | EDE21           | Ilo11           |
| <i>Brachymeles ilocandia</i>  | OMNH-46595       | EDE22           | Ilo10           |
| <i>Brachymeles kadwa</i>      | OMNH-45791       | CDS8451         | KAD04           |

| <b>Species</b>                  | <b>Museum ID</b> | <b>Field ID</b> | <b>Trial ID</b> |
|---------------------------------|------------------|-----------------|-----------------|
| <i>Brachymeles kadwa</i>        | OMNH-45792       | CDS8452         | KAD10           |
| <i>Brachymeles kadwa</i>        | OMNH-45793       | CDS8453         | KAD03           |
| <i>Brachymeles kadwa</i>        | OMNH-45794       | CDS8454         | KAD05           |
| <i>Brachymeles kadwa</i>        | OMNH-45795       | CDS8455         | KAD01           |
| <i>Brachymeles kadwa</i>        | OMNH-45796       | CDS8456         | KAD06           |
| <i>Brachymeles kadwa</i>        | OMNH-45797       | CDS8457         | KAD07           |
| <i>Brachymeles kadwa</i>        | OMNH-45798       | CDS8458         | KAD08           |
| <i>Brachymeles kadwa</i>        | OMNH-45799       | CDS8459         | KAD02           |
| <i>Brachymeles kadwa</i>        | OMNH-45800       | CDS8460         | KAD11           |
| <i>Brachymeles kadwa</i>        | OMNH-45801       | CDS8461         | KAD09           |
| <i>Brachymeles kadwa</i>        | OMNH-45802       | CDS8651         | KADB            |
| <i>Brachymeles kadwa</i>        | OMNH-45803       | CDS8652         | KADA            |
| <i>Brachymeles kadwa</i>        | OMNH-45804       | CDS8653         | KADC            |
| <i>Brachymeles kadwa</i>        | OMNH-45805       | CDS8654         | KADF            |
| <i>Brachymeles kadwa</i>        | OMNH-45806       | CDS8655         | KADD            |
| <i>Brachymeles kadwa</i>        | OMNH-45807       | CDS8656         | KADE            |
| <i>Brachymeles lukbani</i>      | OMNH-45810       | CDS8305         | LUK04           |
| <i>Brachymeles lukbani</i>      | OMNH-45811       | CDS8363         | LUK16           |
| <i>Brachymeles lukbani</i>      | OMNH-45812       | CDS8364         | LUK49           |
| <i>Brachymeles lukbani</i>      | OMNH-45813       | CDS8366         | LUK05           |
| <i>Brachymeles lukbani</i>      | OMNH-45814       | CDS8367         | LUK13           |
| <i>Brachymeles lukbani</i>      | OMNH-45815       | CDS8369         | LUK10           |
| <i>Brachymeles lukbani</i>      | OMNH-45816       | CDS8371         | LUK21           |
| <i>Brachymeles lukbani</i>      | OMNH-45817       | CDS8372         | LUK08           |
| <i>Brachymeles lukbani</i>      | OMNH-45818       | CDS8373         | LUK27           |
| <i>Brachymeles lukbani</i>      | OMNH-45819       | CDS8374         | LUK15           |
| <i>Brachymeles lukbani</i>      | OMNH-45820       | CDS8375         | LUK50           |
| <i>Brachymeles lukbani</i>      | OMNH-45821       | CDS8376         | LUK48           |
| <i>Brachymeles lukbani</i>      | OMNH-45822       | CDS8377         | LUK20           |
| <i>Brachymeles lukbani</i>      | OMNH-45823       | CDS8378         | LUK44           |
| <i>Brachymeles lukbani</i>      | OMNH-45824       | CDS8379         | LUK07           |
| <i>Brachymeles lukbani</i>      | OMNH-45689       | ESF107          | LUK01           |
| <i>Brachymeles miriamae</i>     | No voucher       | ESF436          | MIR01           |
| <i>Brachymeles miriamae</i>     | No voucher       | ESF439          | MIR02           |
| <i>Brachymeles miriamae</i>     | No voucher       | ESF445          | MIR03           |
| <i>Brachymeles miriamae</i>     | No voucher       | ESF446          | MIR04           |
| <i>Brachymeles miriamae</i>     | OMNH-46511       | ESF451          | MIR05           |
| <i>Brachymeles miriamae</i>     | OMNH-46512       | ESF547          | MIR06           |
| <i>Brachymeles miriamae</i>     | OMNH-46514       | ESF579          | MIR07           |
| <i>Brachymeles muntingkamay</i> | OMNH-46713       | CDS9132         | MUT02           |
| <i>Brachymeles muntingkamay</i> | OMNH-46714       | CDS9133         | MUT21           |
| <i>Brachymeles muntingkamay</i> | OMNH-46715       | CDS9134         | MUT04           |

| <b>Species</b>                  | <b>Museum ID</b> | <b>Field ID</b> | <b>Trial ID</b> |
|---------------------------------|------------------|-----------------|-----------------|
| <i>Brachymeles muntingkamay</i> | OMNH-46716       | CDS9135         | MUT01           |
| <i>Brachymeles muntingkamay</i> | OMNH-46717       | CDS9136         | MUT15           |
| <i>Brachymeles muntingkamay</i> | OMNH-46718       | CDS9137         | MUT14           |
| <i>Brachymeles muntingkamay</i> | OMNH-46719       | CDS9138         | MUT06           |
| <i>Brachymeles muntingkamay</i> | OMNH-46720       | CDS9139         | MUT05           |
| <i>Brachymeles muntingkamay</i> | OMNH-46721       | CDS9140         | MUT03           |
| <i>Brachymeles muntingkamay</i> | OMNH-46722       | CDS9145         | MUTA            |
| <i>Brachymeles muntingkamay</i> | OMNH-46723       | CDS9148         | MUT09           |
| <i>Brachymeles muntingkamay</i> | OMNH-46724       | CDS9149         | MUT07           |
| <i>Brachymeles muntingkamay</i> | OMNH-46725       | CDS9150         | MUT12           |
| <i>Brachymeles muntingkamay</i> | OMNH-46726       | CDS9151         | MUT13           |
| <i>Brachymeles muntingkamay</i> | OMNH-46727       | CDS9152         | MUT18           |
| <i>Brachymeles muntingkamay</i> | OMNH-46728       | CDS9153         | MUT17           |
| <i>Brachymeles orientalis</i>   | KU-337148        | CDS6522         | ORI02           |
| <i>Brachymeles orientalis</i>   | KU-337152        | CDS6694         | ORI03           |
| <i>Brachymeles orientalis</i>   | KU-337153        | CDS6695         | ORI01           |
| <i>Brachymeles orientalis</i>   | KU-337154        | CDS6698         | ORI05           |
| <i>Brachymeles orientalis</i>   | KU-337156        | CDS6700         | ORI04           |
| <i>Brachymeles orientalis</i>   | KU-337164        | CDS6757         | ORI07           |
| <i>Brachymeles orientalis</i>   | OMNH-44660       | CDS6761         | ORI10           |
| <i>Brachymeles orientalis</i>   | KU-337166        | CDS6790         | ORI06           |
| <i>Brachymeles orientalis</i>   | KU-337167        | CDS6791         | ORI09           |
| <i>Brachymeles orientalis</i>   | OMNH-44661       | CDS6894         | ORI08           |
| <i>Brachymeles orientalis</i>   | KU-337169        | CDS6895         | ORI11           |
| <i>Brachymeles orientalis</i>   | KU-337170        | CDS6896         | ORI12           |
| <i>Brachymeles samad</i>        | KU-337182        | CDS6514         | SMD04           |
| <i>Brachymeles samad</i>        | KU-337183        | CDS6516         | SMD05           |
| <i>Brachymeles samad</i>        | KU-337184        | CDS6518         | SMD02           |
| <i>Brachymeles samad</i>        | OMNH-44666       | CDS6520         | SMD08           |
| <i>Brachymeles samad</i>        | KU-337186        | CDS6521         | SMD03           |
| <i>Brachymeles samad</i>        | KU-337191        | CDS6583         | SMD01           |
| <i>Brachymeles samad</i>        | KU-337192        | CDS6585         | SMD06           |
| <i>Brachymeles samad</i>        | KU-337193        | CDS6588         | SMD07           |
| <i>Brachymeles samad</i>        | OMNH-44669       | CDS6693         | SMD09           |
| <i>Brachymeles samad</i>        | KU-337197        | CDS6697         | SMD11           |
| <i>Brachymeles samad</i>        | KU-337198        | CDS6703         | SMD10           |
| <i>Brachymeles samad</i>        | OMNH-44670       | CDS6704         | SMD12           |
| <i>Brachymeles samad</i>        | KU-337201        | CDS6759         | SMD13           |
| <i>Brachymeles samad</i>        | KU-337203        | CDS6892         | SMD15           |
| <i>Brachymeles samad</i>        | KU-337204        | CDS6893         | SMD14           |
| <i>Brachymeles taylori</i>      | OMNH-46427       | CDS9017         | TAY08           |
| <i>Brachymeles taylori</i>      | OMNH-46428       | CDS9018         | TAY07           |

| <b>Species</b>                 | <b>Museum ID</b> | <b>Field ID</b> | <b>Trial ID</b> |
|--------------------------------|------------------|-----------------|-----------------|
| <i>Brachymeles taylori</i>     | OMNH-46429       | CDS9019         | TAY11           |
| <i>Brachymeles taylori</i>     | OMNH-46434       | ESF295          | TAY05           |
| <i>Brachymeles taylori</i>     | OMNH-46435       | ESF297          | TAY01           |
| <i>Brachymeles taylori</i>     | OMNH-46436       | ESF299          | TAY03           |
| <i>Brachymeles taylori</i>     | OMNH-46424       | ESF364          | TAY14           |
| <i>Brachymeles taylori</i>     | OMNH-46425       | ESF366          | TAY13           |
| <i>Brachymeles taylori</i>     | OMNH-46426       | ESF367          | TAY12           |
| <i>Brachymeles taylori</i>     | No voucher       | ESF390          | TAY16           |
| <i>Brachymeles taylori</i>     | No voucher       | ESF391          | TAY18           |
| <i>Brachymeles taylori</i>     | No voucher       | ESF397          | TAY15           |
| <i>Brachymeles taylori</i>     | No voucher       | ESF398          | TAY19           |
| <i>Brachymeles taylori</i>     | No voucher       | ESF402          | TAY21           |
| <i>Brachymeles taylori</i>     | No voucher       | ESF404          | TAY17           |
| <i>Brachymeles taylori</i>     | No voucher       | ESF407          | TAY20           |
| <i>Brachymeles tridactylus</i> | OMNH-46437       | CDS9020         | TRI15           |
| <i>Brachymeles tridactylus</i> | OMNH-46438       | CDS9021         | TRI14           |
| <i>Brachymeles tridactylus</i> | OMNH-46439       | CDS9022         | TRI19           |
| <i>Brachymeles tridactylus</i> | OMNH-46440       | CDS9023         | TRI18           |
| <i>Brachymeles tridactylus</i> | OMNH-46441       | CDS9024         | TRI17           |
| <i>Brachymeles tridactylus</i> | OMNH-46442       | CDS9025         | TRI13           |
| <i>Brachymeles tridactylus</i> | OMNH-46443       | CDS9026         | TRI16           |
| <i>Brachymeles tridactylus</i> | OMNH-46446       | ESF274          | TRI01           |
| <i>Brachymeles tridactylus</i> | OMNH-46452       | ESF294          | TRI04           |
| <i>Brachymeles tridactylus</i> | OMNH-46453       | ESF296          | TRI07           |
| <i>Brachymeles tridactylus</i> | OMNH-46454       | ESF298          | TRI03           |
| <i>Brachymeles tridactylus</i> | OMNH-46455       | ESF300          | TRI02           |
| <i>Brachymeles tridactylus</i> | OMNH-46456       | ESF301          | TRI08           |
| <i>Brachymeles tridactylus</i> | OMNH-46457       | ESF319          | TRI11           |
| <i>Lygosoma bowringii</i>      | OMNH-46521       | ESF419          | LBO01           |
| <i>Lygosoma bowringii</i>      | OMNH-46522       | ESF442          | LBO02           |
| <i>Lygosoma bowringii</i>      | ZMKU-R-00814     | ESF498          | LBO03           |
| <i>Lygosoma bowringii</i>      | ZMKU-R-00815     | ESF499          | LBO04           |
| <i>Lygosoma bowringii</i>      | ZMKU-R-00816     | ESF500          | LBO05           |
| <i>Lygosoma bowringii</i>      | ZMKU-R-00819     | ESF504          | LBO06           |
| <i>Lygosoma bowringii</i>      | ZMKU-R-00820     | ESF506          | LBO07           |
| <i>Lygosoma bowringii</i>      | OMNH-46424       | ESF519          | LBO08           |
| <i>Lygosoma bowringii</i>      | No voucher       | ESF538          | LBO09           |
| <i>Lygosoma bowringii</i>      | No voucher       | ESF561          | LBO10           |
| <i>Lygosoma bowringii</i>      | No voucher       | ESF569          | LBO11           |
| <i>Lygosoma bowringii</i>      | No voucher       | ESF570          | LBO12           |

**Supplementary Table S3:** Variable loadings, eigenvalues and percent variance explained by the first two PCs from a phylogenetic PCA on morphometric variables for species average data. Only pPC-1 is interpreted in the study, representing an index of how lizard-like (low values) or snake-like (high values) a species is. (a) pPCA using a correlation matrix, the PCA that is used in the main study (phylogenetic signal,  $\lambda = 0.755$ ), (b) pPCA using a covariance matrix for comparison ( $\lambda = 0.755$ ), (c) pPCA using a correlation matrix and decomposing the hindlimb into segments, also for comparison ( $\lambda = 0$ ).

**A. pPCA using correlation matrix**

| Variable                   | pPC-1  | pPC-2  |
|----------------------------|--------|--------|
| # Digits                   | -0.959 | 0.216  |
| Head Length                | -0.768 | -0.595 |
| Relative Snout–vent Length | 0.836  | 0.382  |
| Relative Body Width        | -0.802 | -0.083 |
| Relative Fore-Limb Length  | -0.932 | 0.345  |
| Relative Hind Limb Length  | -0.938 | 0.335  |
| Eigenvalue                 | 4.598  | 0.786  |
| % Variance                 | 76.63  | 13.10  |

**B. pPCA using covariance matrix**

| Variable                   | pPC-1  | pPC-2  |
|----------------------------|--------|--------|
| # Digits                   | -0.975 | 0.120  |
| Head Length                | -0.539 | 0.831  |
| Relative Snout–vent Length | 0.671  | -0.578 |
| Relative Body Width        | -0.690 | 0.365  |
| Relative Fore-Limb Length  | -0.998 | -0.024 |
| Relative Hind Limb Length  | -0.999 | -0.011 |
| Eigenvalue                 | 0.088  | 0.001  |
| % Variance                 | 97.73  | 1.54   |

**C. pPCA using correlation matrix with hind limb decomposed**

| Variable                   | pPC-1  | pPC-2  |
|----------------------------|--------|--------|
| # Digits                   | -0.971 | -0.189 |
| Head Length                | -0.805 | 0.448  |
| Relative Snout–vent Length | 0.906  | -0.315 |
| Relative Body Width        | -0.862 | 0.170  |
| Relative Fore-Limb Length  | -0.942 | -0.325 |
| Relative Thigh Length      | -0.937 | -0.341 |
| Relative Crus Length       | -0.944 | -0.323 |
| Relative Foot Length       | -0.970 | 0.150  |
| Relative Digit IV Length   | -0.937 | 0.188  |
| Eigenvalue                 | 7.630  | 0.748  |
| % Variance                 | 84.77  | 8.31   |

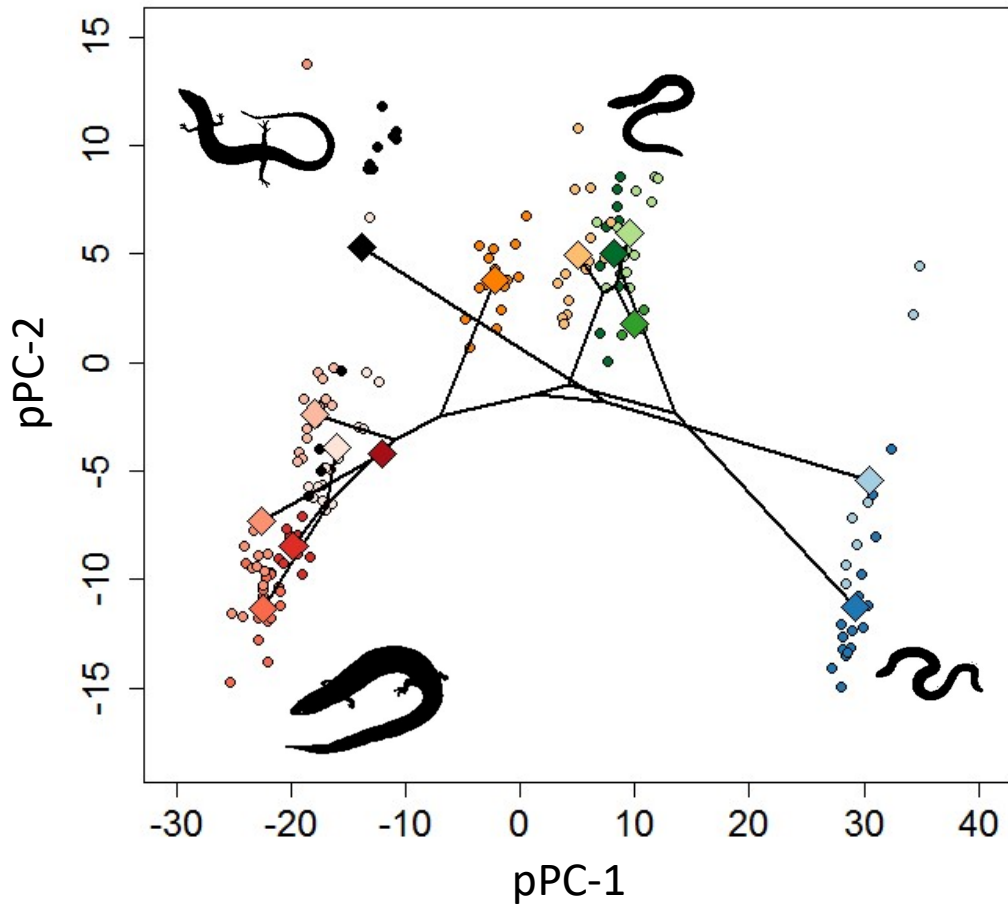

**Supplementary Figure S1:** Phylomorphospace defined by the first two pPCs. pPC-1 represents an index of how pentadactyl versus snake-like each individual and species was. Species pPC scores are represented with large diamonds, and individuals with small diamonds. The phylogeny is mapped on, connecting the species scores. Species are uniquely color-coded, with pentadactyl species being shades of red, those with three digits being orange and yellow, those with two digits being shades of green, limbless ones being shades of blue, and *Lygosoma bowringii* being black. Representative species silhouettes are provided for ease of interpretation. Note that more pentadactyl species are also larger.



**Supplementary Table S4:** Models of trait evolution fitted to *Brachymeles* head length data, which were used as a proxy for size. The two optimum Ornstein-Uhlenbeck (OU) model assigned one optimum to the pentadactyl clade and another to the rest of the phylogeny. The three optimum OU model assigned one optimum to the pentadactyl clade, another to the paraphyletic group including all species with reduced limbs, and another to all limbless species. Data were included for 40 species of *Brachymeles* and the phylogeny from Wagner et al. (2018) was used. K is the number of model parameters,  $\Delta_{AIC}$  is the difference in AIC from the best model, and  $w_i$  is the model weight, summing to one. The best model is in bold and its parameters are given under the table.

| <b>Model</b>            | <b>K</b> | <b>lnL</b>   | <b>AICc</b>  | $\Delta_{AIC}$ | $w_i$        |
|-------------------------|----------|--------------|--------------|----------------|--------------|
| Brownian motion         | 2        | -80.2        | 164.7        | 27.8           | <0.001       |
| OU - single optimum     | 3        | -68.4        | 143.4        | 6.6            | 0.027        |
| <b>OU - two optima*</b> | <b>4</b> | <b>-63.8</b> | <b>136.8</b> | <b>0.0</b>     | <b>0.718</b> |
| OU - three optima       | 5        | -63.6        | 138.9        | 2.1            | 0.255        |

\* Best model: evolutionary rate ( $\sigma^2$ ) = 3.901, strength of selection ( $\alpha$ ) = 0.278, pentadactyl optimum ( $\theta_p$ ) = 25.6±5.7mm, optimum for other species ( $\theta_o$ ) = 5.1±0.9mm.

**Supplementary Table S5:** Results from phylogenetic generalized least squares (PGLS) regressions. The phylogenetic signal ( $\lambda$ ),  $R^2$ , intercept and slope, their standard errors, and p-values are presented for each analysis. Loco stands for locomotion, with S-B indicating relationships between surface locomotion and burying. The substrate type is included for each analysis with locomotion variables. p-values in bold are  $<0.05$ , and p-values significant after correction for multiple comparisons are also underlined.

Abbreviations: Est – estimate, SE – standard error of the estimate, P – p-value. Vavg – average velocity, Vmax – maximum velocity, mid – mid-body point, pec – pectoral point, pel – pelvic point, amp – amplitude, freq – frequency, wl – wavelength, FLuse – front limb use, HLuse – hind limb use, Fmax – maximum burrowing force, D – dorsal, L – lateral, point – pointiness of snout, slope – slope of snout, LBC – load-bearing capacity of soil, S.moist – Soil moisture.

**A: Relationships between surface locomotion and burying performance**

| Subst  | Variable | $\lambda$ | $R^2$ | Intercept |       |       |                      | Slope |       |      |                      |
|--------|----------|-----------|-------|-----------|-------|-------|----------------------|-------|-------|------|----------------------|
|        |          |           |       | Est       | SE    | t     | P                    | Est   | SE    | t    | P                    |
| Coarse | Vavg     | 0         | 0.413 | -0.009    | 0.028 | -0.30 | 0.7665               | 0.191 | 0.066 | 2.91 | <b><u>0.0131</u></b> |
| Fine   | Vavg     | 0         | 0.292 | 0.059     | 0.019 | 3.06  | <b><u>0.0099</u></b> | 0.092 | 0.041 | 2.23 | <b><u>0.0459</u></b> |
| Coarse | Vmax     | 0         | 0.296 | -0.144    | 0.205 | -0.70 | 0.4950               | 0.613 | 0.273 | 2.24 | <b><u>0.0445</u></b> |
| Fine   | Vmax     | 0         | 0.243 | 0.070     | 0.123 | 0.57  | 0.5796               | 0.340 | 0.173 | 1.96 | 0.0732               |

Supplementary Table S5: Continued.

**B: Relationships between body form and surface locomotion**

| Subst  | X     | Y        | $\lambda$ | R <sup>2</sup> | Intercept |       |       |                          | Slope  |       |       |                      |
|--------|-------|----------|-----------|----------------|-----------|-------|-------|--------------------------|--------|-------|-------|----------------------|
|        |       |          |           |                | Est       | SE    | t     | P                        | Est    | SE    | t     | P                    |
| Coarse | pPC-1 | mid.amp  | 0         | 0.051          | 0.014     | 0.002 | 6.86  | <b><u>&lt;0.0001</u></b> | <0.001 | 0.000 | 0.81  | 0.4361               |
| Fine   | pPC-1 | mid.amp  | 0         | 0.018          | 0.017     | 0.004 | 4.49  | <b><u>0.0007</u></b>     | <0.001 | 0.000 | 0.47  | 0.6433               |
| Coarse | pPC-1 | mid.freq | 1         | 0.118          | 5.978     | 1.736 | 3.44  | <b><u>0.0049</u></b>     | -0.042 | 0.033 | -1.26 | 0.2302               |
| Fine   | pPC-1 | mid.freq | 1         | 0.358          | 6.025     | 1.651 | 3.61  | <b><u>0.0033</u></b>     | -0.081 | 0.031 | -2.59 | <b><u>0.0238</u></b> |
| Coarse | pPC-1 | mid.wl   | 0         | 0.314          | 0.073     | 0.007 | 10.33 | <b><u>&lt;0.0001</u></b> | -0.001 | 0.000 | -2.35 | <b><u>0.0370</u></b> |
| Fine   | pPC-1 | mid.wl   | 0         | 0.277          | 0.074     | 0.010 | 7.64  | <b><u>&lt;0.0001</u></b> | -0.001 | 0.001 | -2.14 | 0.0533               |
| Coarse | pPC-1 | pec.amp  | 0         | 0.085          | 0.012     | 0.002 | 7.03  | <b><u>&lt;0.0001</u></b> | <0.001 | 0.000 | 1.05  | 0.3109               |
| Fine   | pPC-1 | pec.amp  | 0         | 0.001          | 0.014     | 0.004 | 3.97  | <b><u>0.0018</u></b>     | <0.001 | 0.000 | 0.09  | 0.9263               |
| Coarse | pPC-1 | pec.freq | 0.98      | 0.120          | 5.489     | 1.584 | 3.46  | <b><u>0.0047</u></b>     | -0.039 | 0.031 | -1.28 | 0.2249               |
| Fine   | pPC-1 | pec.freq | 1         | 0.326          | 6.080     | 1.774 | 3.43  | <b><u>0.0050</u></b>     | -0.081 | 0.034 | -2.41 | <b><u>0.0331</u></b> |
| Coarse | pPC-1 | pec.wl   | 0         | 0.301          | 0.079     | 0.005 | 15.86 | <b><u>&lt;0.0001</u></b> | -0.001 | 0.000 | -2.27 | <b><u>0.0423</u></b> |
| Fine   | pPC-1 | pec.wl   | 0         | 0.120          | 0.083     | 0.011 | 7.32  | <b><u>&lt;0.0001</u></b> | -0.001 | 0.001 | -1.28 | 0.2253               |
| Coarse | pPC-1 | pel.amp  | 0         | 0.059          | 0.018     | 0.003 | 6.10  | <b><u>0.0001</u></b>     | <0.001 | 0.000 | 0.87  | 0.4014               |
| Fine   | pPC-1 | pel.amp  | 0         | 0.040          | 0.055     | 0.041 | 1.33  | 0.2082                   | -0.002 | 0.002 | -0.71 | 0.4913               |
| Coarse | pPC-1 | pel.freq | 1         | 0.190          | 5.790     | 1.698 | 3.41  | <b><u>0.0052</u></b>     | -0.054 | 0.032 | -1.68 | 0.1196               |
| Fine   | pPC-1 | pel.freq | 1         | 0.358          | 5.910     | 1.555 | 3.80  | <b><u>0.0025</u></b>     | -0.076 | 0.029 | -2.59 | <b><u>0.0238</u></b> |
| Coarse | pPC-1 | pel.wl   | 0         | 0.197          | 0.077     | 0.009 | 8.23  | <b><u>&lt;0.0001</u></b> | -0.001 | 0.001 | -1.72 | 0.1116               |
| Fine   | pPC-1 | pel.wl   | 0         | 0.347          | 0.077     | 0.006 | 12.67 | <b><u>&lt;0.0001</u></b> | -0.001 | 0.000 | -2.52 | <b><u>0.0267</u></b> |
| Coarse | pPC-1 | Vavg     | 0.96      | 0.297          | 0.457     | 0.145 | 3.15  | <b><u>0.0084</u></b>     | -0.006 | 0.003 | -2.25 | <b><u>0.0437</u></b> |
| Fine   | pPC-1 | Vavg     | 0         | 0.461          | 0.385     | 0.050 | 7.73  | <b><u>&lt;0.0001</u></b> | -0.009 | 0.003 | -3.21 | <b><u>0.0076</u></b> |
| Coarse | pPC-1 | Vmax     | 0         | 0.444          | 0.683     | 0.054 | 12.54 | <b><u>&lt;0.0001</u></b> | -0.010 | 0.003 | -3.09 | <b><u>0.0093</u></b> |
| Fine   | pPC-1 | Vmax     | 0.97      | 0.416          | 0.785     | 0.202 | 3.89  | <b><u>0.0021</u></b>     | -0.011 | 0.004 | -2.93 | <b><u>0.0127</u></b> |

**Supplementary Table S5:** Continued.

**C: Relationships between body form and burying locomotion**

| Subst  | X     | Y     | $\lambda$ | R <sup>2</sup> | Intercept |       |       |                          | Slope  |       |       |               |
|--------|-------|-------|-----------|----------------|-----------|-------|-------|--------------------------|--------|-------|-------|---------------|
|        |       |       |           |                | Est       | SE    | t     | P                        | Est    | SE    | t     | P             |
| Coarse | pPC-1 | Vavg  | 0         | 0.320          | 0.060     | 0.014 | 4.39  | <b><u>0.0009</u></b>     | -0.002 | 0.001 | -2.38 | <b>0.0349</b> |
| Fine   | pPC-1 | Vavg  | 0         | 0.094          | 0.095     | 0.011 | 8.65  | <b><u>&lt;0.0001</u></b> | -0.001 | 0.001 | -1.12 | 0.2858        |
| Coarse | pPC-1 | Vmax  | 0         | 0.264          | 0.268     | 0.071 | 3.80  | <b><u>0.0025</u></b>     | -0.008 | 0.004 | -2.08 | 0.0600        |
| Fine   | pPC-1 | Vmax  | 0         | 0.117          | 0.279     | 0.056 | 5.01  | <b><u>0.0003</u></b>     | -0.004 | 0.003 | -1.26 | 0.2319        |
| Coarse | pPC-1 | Fmax  | 0         | 0.332          | 0.225     | 0.027 | 8.35  | <b><u>&lt;0.0001</u></b> | -0.004 | 0.002 | -2.23 | <b>0.0498</b> |
| Fine   | pPC-1 | Fmax  | 0         | 0.462          | 0.247     | 0.047 | 5.29  | <b><u>0.0004</u></b>     | -0.008 | 0.003 | -2.93 | <b>0.0150</b> |
| Coarse | pPC-1 | FLuse | 0         | 0.878          | 0.640     | 0.056 | 11.42 | <b><u>&lt;0.0001</u></b> | -0.019 | 0.003 | -7.10 | <b>0.0002</b> |
| Fine   | pPC-1 | FLuse | 0         | 0.724          | 0.699     | 0.069 | 10.15 | <b><u>&lt;0.0001</u></b> | -0.017 | 0.004 | -4.85 | <b>0.0009</b> |
| Coarse | pPC-1 | HLuse | 0         | 0.474          | 0.479     | 0.120 | 3.99  | <b><u>0.0053</u></b>     | -0.014 | 0.006 | -2.51 | <b>0.0404</b> |
| Fine   | pPC-1 | HLuse | 0         | 0.362          | 0.569     | 0.109 | 5.21  | <b><u>0.0006</u></b>     | -0.013 | 0.006 | -2.26 | 0.0501        |

Supplementary Table S5: Continued.

D: Analyses using relative locomotion variables (divided by HL)

| Loco    | Subst  | X     | Y       | $\lambda$ | R <sup>2</sup> | Intercept |       |       |                          | Slope  |       |       |                      |
|---------|--------|-------|---------|-----------|----------------|-----------|-------|-------|--------------------------|--------|-------|-------|----------------------|
|         |        |       |         |           |                | Est       | SE    | t     | P                        | Est    | SE    | t     | P                    |
| S-B     | Coarse |       | Vavg    | 0         | 0.413          | 1.394     | 4.648 | -0.30 | 0.7694                   | 0.190  | 0.066 | 2.90  | <b><u>0.0133</u></b> |
| S-B     | Fine   |       | Vavg    | 0         | 0.212          | 3.099     | 4.860 | 0.64  | 0.5357                   | 0.112  | 0.062 | 1.79  | 0.0979               |
| Surface | Coarse | pPC-1 | Vavg    | 0.96      | 0.298          | 75.92     | 24.09 | 3.15  | <b><u>0.0084</u></b>     | -1.076 | 0.477 | -2.26 | <b><u>0.0434</u></b> |
| Surface | Fine   | pPC-1 | Vavg    | 0         | 0.461          | 63.95     | 8.272 | 7.73  | <b><u>&lt;0.0001</u></b> | -1.495 | 0.467 | -3.20 | <b><u>0.0076</u></b> |
| Surface | Coarse | pPC-1 | Vmax    | 0         | 0.444          | 113.4     | 9.039 | 12.54 | <b><u>&lt;0.0001</u></b> | -1.581 | 0.510 | -3.10 | <b><u>0.0092</u></b> |
| Surface | Fine   | pPC-1 | Vmax    | 0.97      | 0.417          | 130.2     | 33.46 | 3.89  | <b><u>0.0021</u></b>     | -1.908 | 0.651 | -2.93 | <b><u>0.0126</u></b> |
| Surface | Coarse | pPC-1 | mid_amp | 0         | 0.052          | 2.403     | 0.351 | 6.86  | <b><u>&lt;0.0001</u></b> | 0.016  | 0.020 | 0.81  | 0.4337               |
| Surface | Fine   | pPC-1 | mid_amp | 0         | 0.018          | 2.892     | 0.644 | 4.49  | <b><u>0.0007</u></b>     | 0.017  | 0.036 | 0.47  | 0.6442               |
| Surface | Coarse | pPC-1 | mid_wl  | 0         | 0.315          | 12.18     | 1.178 | 10.34 | <b><u>&lt;0.0001</u></b> | -0.156 | 0.067 | -2.35 | <b><u>0.0369</u></b> |
| Surface | Fine   | pPC-1 | mid_wl  | 0         | 0.277          | 12.30     | 1.610 | 7.64  | <b><u>&lt;0.0001</u></b> | -0.195 | 0.091 | -2.14 | 0.0534               |
| Bury    | Coarse | pPC-1 | Vavg    | 0         | 0.320          | 9.926     | 2.260 | 4.39  | <b><u>0.0009</u></b>     | -0.304 | 0.128 | -2.38 | <b><u>0.0348</u></b> |
| Bury    | Fine   | pPC-1 | Vavg    | 0         | 0.094          | 15.81     | 1.828 | 8.65  | <b><u>&lt;0.0001</u></b> | -0.115 | 0.103 | -1.12 | 0.2860               |
| Bury    | Coarse | pPC-1 | Vmax    | 0         | 0.264          | 44.55     | 11.72 | 3.80  | <b><u>0.0025</u></b>     | -1.373 | 0.662 | -2.08 | 0.0601               |
| Bury    | Fine   | pPC-1 | Vmax    | 0         | 0.117          | 46.36     | 9.247 | 5.01  | <b><u>0.0003</u></b>     | -0.657 | 0.522 | -1.26 | 0.2320               |
| Bury    | Coarse | pPC-1 | Fmax    | 0         | 0.335          | 37.19     | 4.490 | 8.28  | <b><u>&lt;0.0001</u></b> | -0.610 | 0.272 | -2.24 | <b><u>0.0489</u></b> |
| Bury    | Fine   | pPC-1 | Fmax    | 0         | 0.461          | 40.70     | 7.822 | 5.20  | <b><u>0.0004</u></b>     | -1.385 | 0.474 | -2.92 | <b><u>0.0152</u></b> |

**Supplementary Table S5:** Continued.

**E: Relationships between head and body shape**

| X       | Y       | $\lambda$ | $R^2$ | Intercept |       |        |                   | Slope  |       |       |               |
|---------|---------|-----------|-------|-----------|-------|--------|-------------------|--------|-------|-------|---------------|
|         |         |           |       | Est       | SE    | t      | P                 | Est    | SE    | t     | P             |
| pPC-1   | D_point | 0         | 0.009 | 0.330     | 0.006 | 57.862 | <b>&lt;0.0001</b> | <0.001 | 0.000 | -0.34 | 0.7411        |
| pPC-1   | L_point | 0.7       | 0.022 | 0.404     | 0.021 | 19.329 | <b>&lt;0.0001</b> | <0.001 | 0.000 | 0.52  | 0.6143        |
| pPC-1   | D_slope | 0         | 0.413 | 0.475     | 0.008 | 59.145 | <b>&lt;0.0001</b> | -0.001 | 0.000 | -2.91 | <b>0.0131</b> |
| pPC-1   | L_slope | 0         | 0.145 | 0.251     | 0.006 | 42.959 | <b>&lt;0.0001</b> | <0.001 | 0.000 | -1.43 | 0.1792        |
| pPC-1   | D_HW    | 0         | 0.681 | 6.280     | 0.396 | 15.872 | <b>&lt;0.0001</b> | -0.113 | 0.022 | -5.06 | <b>0.0003</b> |
| D_point | D_slope | 0         | 0.018 | 0.559     | 0.173 | 3.23   | <b>0.0072</b>     | -0.247 | 0.523 | -0.47 | 0.6459        |
| D_HW    | D_slope | 0         | 0.335 | 0.421     | 0.025 | 17.14  | <b>&lt;0.0001</b> | 0.009  | 0.004 | 2.46  | <b>0.0301</b> |

Supplementary Table S5: Continued.

F: Relationships between head shape and burying performance

| Subst  | X       | Y    | $\lambda$ | R <sup>2</sup> | Intercept |       |       |               | Slope  |       |       |               |
|--------|---------|------|-----------|----------------|-----------|-------|-------|---------------|--------|-------|-------|---------------|
|        |         |      |           |                | Est       | SE    | t     | P             | Est    | SE    | t     | P             |
| Coarse | D_point | Vavg | 0         | 0.031          | -0.104    | 0.271 | -0.38 | 0.7087        | 0.509  | 0.819 | 0.62  | 0.5461        |
| Fine   | D_point | Vavg | 0         | 0.145          | -0.157    | 0.178 | -0.88 | 0.3953        | 0.770  | 0.539 | 1.43  | 0.1787        |
| Coarse | L_point | Vavg | 0         | 0.134          | 0.373     | 0.226 | 1.65  | 0.1256        | -0.775 | 0.567 | -1.36 | 0.1972        |
| Fine   | L_point | Vavg | 0         | 0.284          | 0.411     | 0.144 | 2.85  | <b>0.0146</b> | -0.789 | 0.361 | -2.18 | <b>0.0496</b> |
| Coarse | D_slope | Vavg | 0         | 0.158          | -0.235    | 0.200 | -1.17 | 0.2626        | 0.627  | 0.418 | 1.50  | 0.1591        |
| Fine   | D_slope | Vavg | 0         | 0.118          | -0.084    | 0.143 | -0.58 | 0.5679        | 0.379  | 0.299 | 1.27  | 0.2291        |
| Coarse | L_slope | Vavg | 0         | 0.028          | -0.045    | 0.188 | -0.24 | 0.8132        | 0.436  | 0.745 | 0.59  | 0.5690        |
| Fine   | L_slope | Vavg | 0         | 0.244          | -0.131    | 0.116 | -1.13 | 0.2824        | 0.905  | 0.460 | 1.97  | 0.0727        |
| Coarse | D_point | Vmax | 0         | 0.002          | 0.060     | 1.369 | 0.04  | 0.9660        | 0.694  | 4.140 | 0.17  | 0.8697        |
| Fine   | D_point | Vmax | 0         | 0.042          | -0.411    | 0.966 | -0.43 | 0.6784        | 2.119  | 2.921 | 0.73  | 0.4821        |
| Coarse | L_point | Vmax | 0         | 0.224          | 2.270     | 1.067 | 2.13  | 0.0548        | -4.981 | 2.676 | -1.86 | 0.0874        |
| Fine   | L_point | Vmax | 0         | 0.150          | 1.455     | 0.804 | 1.81  | 0.0955        | -2.931 | 2.017 | -1.45 | 0.1719        |
| Coarse | D_slope | Vmax | 0         | 0.265          | -1.642    | 0.931 | -1.76 | 0.1031        | 4.042  | 1.943 | 2.08  | 0.0596        |
| Fine   | D_slope | Vmax | 0         | 0.046          | -0.289    | 0.764 | -0.38 | 0.7118        | 1.210  | 1.595 | 0.76  | 0.4625        |
| Coarse | L_slope | Vmax | 0         | 0.232          | -1.290    | 0.834 | -1.55 | 0.1477        | 6.271  | 3.299 | 1.90  | 0.0816        |
| Fine   | L_slope | Vmax | 0         | 0.090          | -0.420    | 0.653 | -0.64 | 0.5329        | 2.814  | 2.585 | 1.09  | 0.2977        |
| Coarse | D_point | Fmax | 0         | 0.060          | -0.233    | 0.595 | -0.39 | 0.7037        | 1.434  | 1.801 | 0.80  | 0.4445        |
| Fine   | D_point | Fmax | 1         | 0.024          | -0.244    | 1.044 | -0.23 | 0.8201        | 1.569  | 3.197 | 0.49  | 0.6343        |
| Coarse | L_point | Fmax | 0         | 0.036          | 0.550     | 0.511 | 1.08  | 0.3071        | -0.778 | 1.281 | -0.61 | 0.5571        |
| Fine   | L_point | Fmax | 1         | 0.039          | 0.865     | 0.947 | 0.91  | 0.3825        | -1.490 | 2.340 | -0.64 | 0.5387        |
| Coarse | D_slope | Fmax | 0         | 0.131          | -0.228    | 0.382 | -0.60 | 0.5647        | 0.975  | 0.795 | 1.23  | 0.2479        |
| Fine   | D_slope | Fmax | 1         | 0.012          | 0.044     | 0.636 | 0.07  | 0.9458        | 0.465  | 1.316 | 0.35  | 0.7312        |
| Coarse | L_slope | Fmax | 0         | 0.060          | -0.040    | 0.353 | -0.11 | 0.9123        | 1.108  | 1.391 | 0.80  | 0.4442        |
| Fine   | L_slope | Fmax | 1         | 0.016          | 0.553     | 0.721 | 0.77  | 0.4604        | -1.153 | 2.858 | -0.40 | 0.6952        |
| Coarse | D_HW    | Fmax | 0         | 0.361          | 0.078     | 0.073 | 1.08  | 0.3065        | 0.024  | 0.010 | 2.38  | <b>0.0387</b> |
| Fine   | D_HW    | Fmax | 0         | 0.357          | -0.029    | 0.141 | -0.20 | 0.8428        | 0.046  | 0.020 | 2.36  | <b>0.0403</b> |

**Supplementary Table S5:** Continued.

**G: Relationships between body form and soil characteristics**

| X       | Y       | $\lambda$ | R <sup>2</sup> | Intercept |        |       |               | Slope  |        |       |        |
|---------|---------|-----------|----------------|-----------|--------|-------|---------------|--------|--------|-------|--------|
|         |         |           |                | Est       | SE     | t     | P             | Est    | SE     | t     | P      |
| pPC-1   | LBC     | 0         | 0.010          | 1.864     | 0.158  | 11.80 | <b>0.0000</b> | -0.003 | 0.010  | -0.27 | 0.7949 |
| pPC-1   | S.moist | 1         | 0.040          | 52.815    | 9.100  | 5.80  | <b>0.0007</b> | -0.258 | 0.475  | -0.54 | 0.6047 |
| D_point | LBC     | 0         | 0.059          | -0.158    | 3.076  | -0.05 | 0.9606        | 6.231  | 9.443  | 0.66  | 0.5304 |
| D_point | S.moist | 1         | 0.057          | -17.12    | 107.71 | -0.16 | 0.8782        | 216.36 | 333.42 | 0.65  | 0.5371 |
| L_point | LBC     | 0         | 0.242          | 5.259     | 2.274  | 2.31  | 0.0540        | -8.423 | 5.641  | -1.49 | 0.1790 |
| L_point | S.moist | 1         | 0.174          | -68.50    | 100.09 | -0.68 | 0.5157        | 298.02 | 245.59 | 1.21  | 0.2643 |
| D_slope | LBC     | 0         | 0.180          | -1.389    | 2.636  | -0.53 | 0.6146        | 6.712  | 5.422  | 1.24  | 0.2557 |
| D_slope | S.moist | 1         | 0.015          | 88.05     | 110.91 | 0.79  | 0.4533        | -73.61 | 229.02 | -0.32 | 0.7573 |
| L_slope | LBC     | 0         | 0.176          | -0.543    | 1.978  | -0.27 | 0.7918        | 9.456  | 7.735  | 1.22  | 0.2611 |
| L_slope | S.moist | 1         | 0.009          | 77.78     | 98.26  | 0.79  | 0.4546        | -99.92 | 387.13 | -0.26 | 0.8038 |



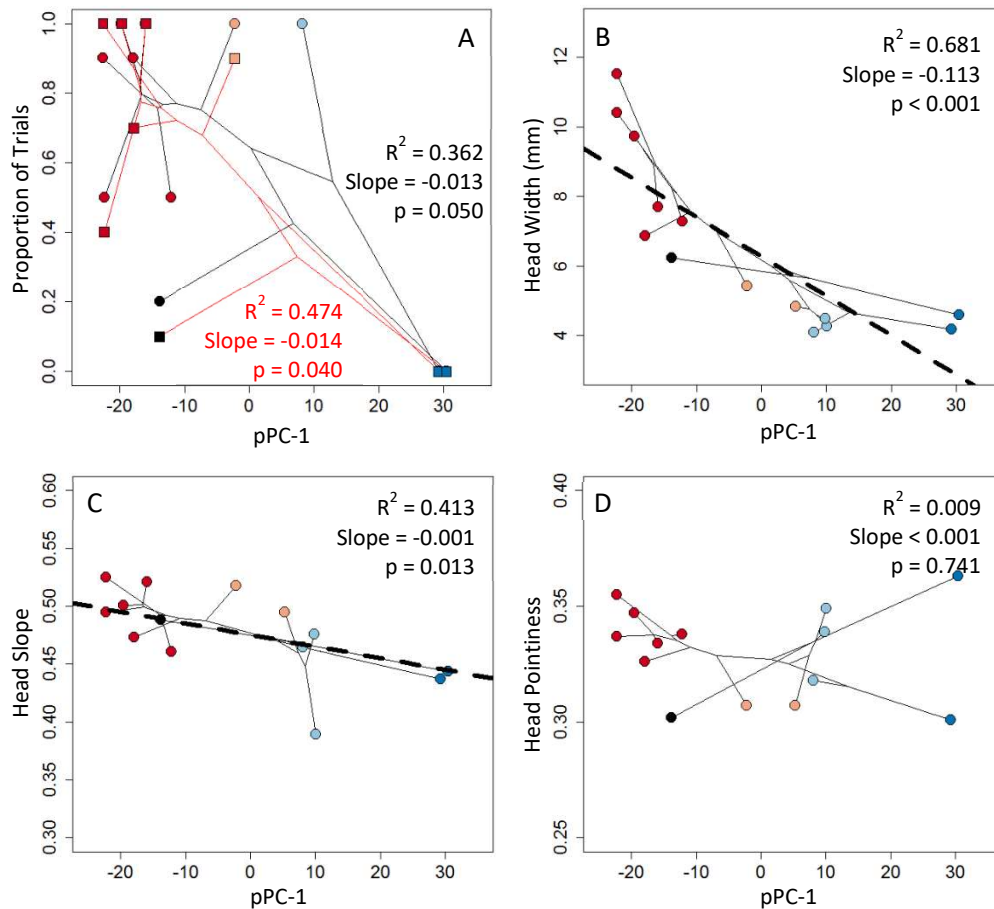

**Supplementary Figure S2:** Phylomorphospaces relating the proportion of trials during which the hind limbs were used during burying (A) and head shape variables (B–D) to body form. Hind limb is presented for fine (diamonds and black lines) and coarse (circles and red lines) substrates. Note that the slope and pointiness of the head are unitless (see Methods). Number of digits is indicated by symbol color: 5 – red, 3 – pink, 2 – light blue, 0 – dark blue, *Lygosoma bowringii* – black. Dashed lines show significant PGLS regressions between variables; no line indicates no significant relationship after correction for multiple comparisons.
